# Supplementary material for: Association between the ERCC2 Asp312Asn polymorphism and risk of cancer
Source: PubMed Central journal article supplement (PMC5564664; doi:10.18632/oncotarget.17290), 2017-04-20
Supplement: oncotarget-08-48488-s001.pdf [file oncotarget-08-48488-s001.pdf]

## **Association between the *ERCC2* Asp312Asn polymorphism and risk of cancer**

### **SUPPLEMENTARY TABLES**

**Supplementary Table 1: Results of sensitivity analysis in overall analysis under homozygote comparison**

See Supplementary File 1

**Supplementary Table 2: PRISMA Checklist**

See Supplementary File 2
